# Supplementary material for: Comparative Study on Macro-Tribological Properties of PLL-g-PEG and PSPMA Polymer Brushes
Source: MDPI journal article supplement (doi:10.3390/polym14091917), 2022-05-08
Supplement: s1 [file s1]

Supplementary Materials for

Comparative study on macro-tribological properties of PLL-g-PEG and  
PSPMA polymer brushes

Fue Ren <sup>1</sup>, **Shuyan Yang** <sup>1,\*</sup>, **Yang Wu** <sup>2</sup>, **Feng Guo** <sup>1</sup>, and **Feng Zhou** <sup>2,\*</sup>.

\*Correspondence: yangshuyan@qut.edu.cn; zhouf@licp.cas.cn.

This file includes: Figures S1–S6

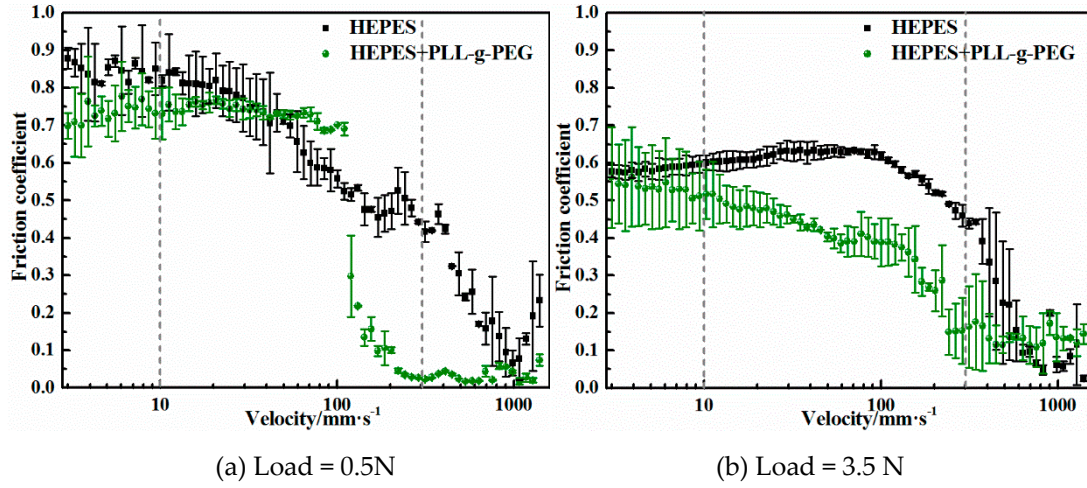

**Figure S1.** Stribeck curves lubricated by HEPES and HEPES added by PLL-g-PEG at the load of 0.5N and 3.5N, respectively. The Stribeck curves was obtained from 1400 mm/s to 3 mm/s, 10 mm/s and 300 mm/s was selected to study the effect of PLL-g-PEG on friction at full-film hydrodynamics and boundary lubrication regime, respectively.

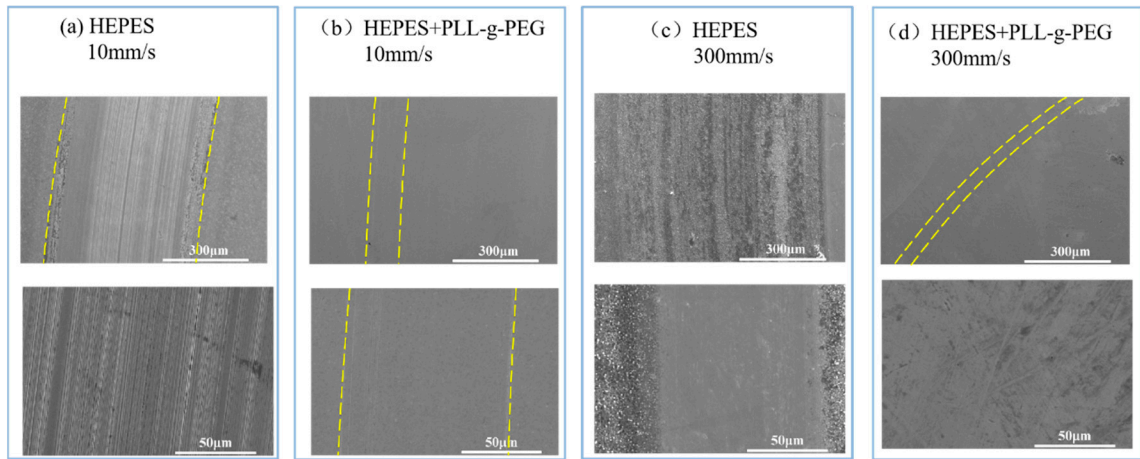

**Figure S2.** SEM image of wear scar on steel ball after friction tests at the load of 0.5N: indicating the reduction in wear by adding PLL-g-PEG.

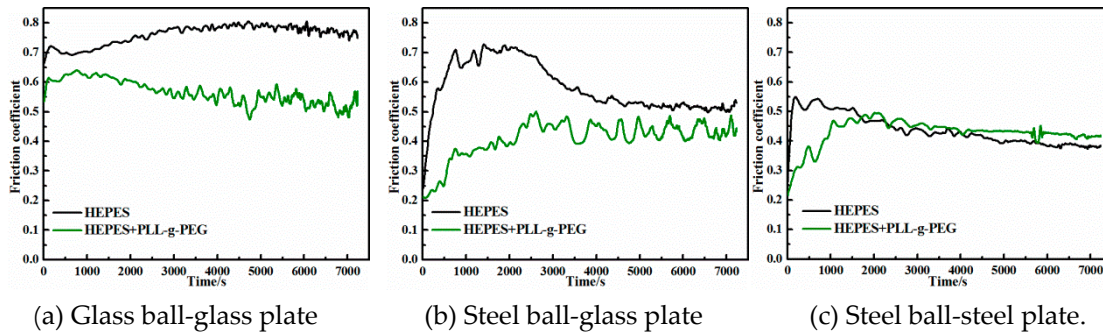

**Figure S3.** Curves of PLL-g-PEG on friction on different substrate at the load of 0.5N and the

velocity of 10mm/s, indicating that the effect of the polymer brush on friction was greatly affected by the base material due to the wettability of the surface.

| Lubricat            | Time(min) |       |       |     |     |      |           |    |
|---------------------|-----------|-------|-------|-----|-----|------|-----------|----|
|                     | 0         | 2     | 5     | 10  | 15  | 30   | 37        | 40 |
| HEPES               | 51°       | 38.5° | 30.5° | 24° | 22° | 7.5° | disappear |    |
| HEPES+<br>PLL-g-PEG | 46°       | 31°   | 30°   | 21° | 16° | 5.5° |           |    |

(a) On steel substrate

| Lubricat            | Time(min) |     |     |     |       |     |  |
|---------------------|-----------|-----|-----|-----|-------|-----|--|
|                     | 0         | 2   | 5   | 10  | 15    | 30  |  |
| HEPES               | 99°       | 96° | 94° | 86° | 80°   | 54° |  |
| HEPES+<br>PLL-g-PEG | 89°       | 85° | 82° | 77° | 65.5° | 45° |  |

(b) On glass substrate

**Figure S4.** Contact angles on steel and glass substrate lubricated by HEPES and HEPES added by PLL-g-PEG, showing that contact angle decreases gradually with time and basically become stable after 30 minute.

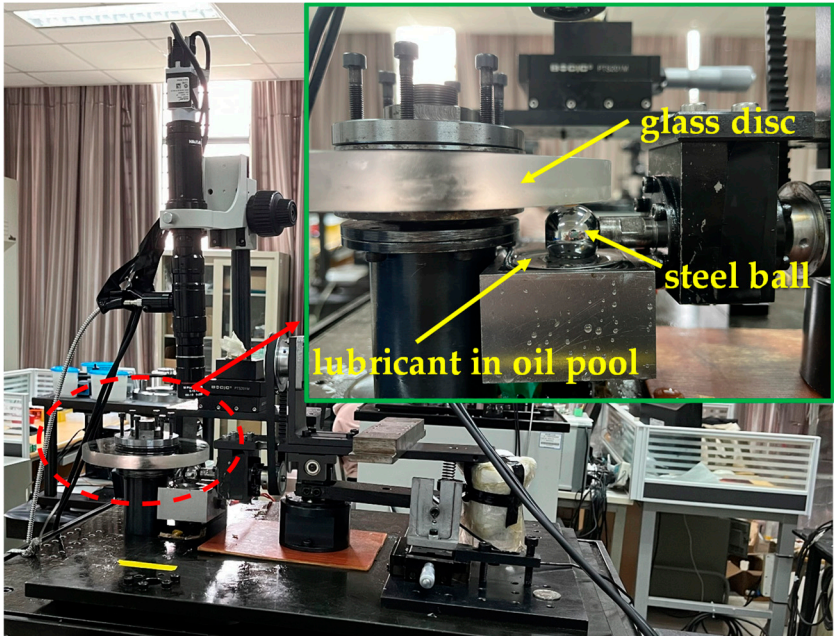

**Figure S5.** Physical diagram of laboratory set for measuring the film thickness, the oil pool with 10  $\mu\text{L}$  of lubricants for a fully flooded (EHL) condition.

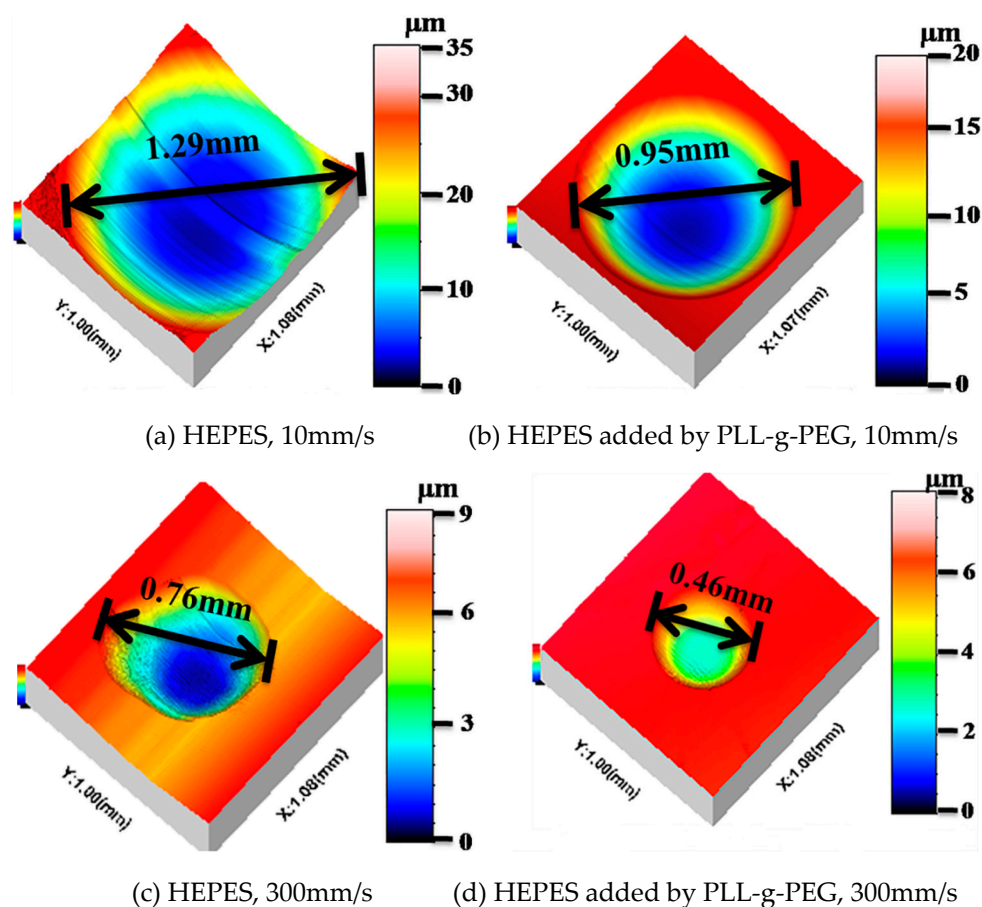

**Figure S6.** Topography of wear scar on glass plates after friction tester using Form Talysurf PGI 800(Taylor Hobson Co. Ltd., Leicester, UK), showing smaller diameter of wear scar by adding PLL-g-PEG. Form
